## Title

- A selective adenylyl cyclase 1 inhibitor relieves pain without causing tolerance

## Running title

- Pain relief through AC1 inhibition

## Authors

Gianna Giacoletti<sup>1</sup>, Tatum Price<sup>1</sup>, Lucas V.B Hoelz<sup>2</sup>, Abdulwhab Shremo Msdi<sup>1</sup>, Katerina Vazquez-Falto<sup>1</sup>, Tácio V. Amorim Fernandes<sup>2,3</sup>, Vinícius Santos de Pontes<sup>2</sup>, Hongbing Wang<sup>4</sup>, Nubia Boechat<sup>2</sup>, Adwoa Nornoo<sup>1</sup>, Tarsis F. Brust<sup>1\*</sup>

## Affiliations

<sup>1</sup> Department of Pharmaceutical Sciences, Lloyd L. Gregory School of Pharmacy, Palm Beach Atlantic University, West Palm Beach, FL, USA 33416.

<sup>2</sup> Drug Synthesis Laboratory, Drug Technology Institute, Farmanguinhos - FIOCRUZ, Oswaldo Cruz Foundation, Manguinhos, RJ, Brazil 21040900.

<sup>3</sup> Instituto Nacional de Metrologia, Qualidade e Tecnologia – INMETRO, Rio de Janeiro, RJ, Brazil 25250020.

<sup>4</sup> Department of Physiology, Michigan State University, East Lansing, MI, USA 48824.

\* Tarsis F. Brust. Tel.: +1 561 803 2757. Fax.: +1 561 803 2703. ORCID:

<https://orcid.org/0000-0003-0912-8273> Email: [tarsis\\_brust@pba.edu](mailto:tarsis_brust@pba.edu)

## Abstract

Adenylyl cyclases (ACs) catalyze the production of the second messenger cyclic adenosine monophosphate from adenosine triphosphate. Among the ten different AC isoforms, studies with knockout animals indicate that inhibition of AC1 can relieve pain and reduce behaviors linked to opioid dependence. We previously identified ST034307 as a selective inhibitor of AC1. The development of an AC1-selective inhibitor now provides the opportunity to further study the therapeutic potential of inhibiting this protein in pre-clinical animal models of pain and related adverse reactions. In the present study we have shown that ST034307 relieves pain in mouse models of formalin-induced inflammatory pain, acid-induced visceral pain, and acid-depressed nesting. In addition, ST034307 did not cause analgesic tolerance after chronic dosing. We also show that the compound is restricted to the periphery following subcutaneous injections and report the predicted molecular interaction between ST034307 and AC1. Our results indicate that AC1 inhibitors represent a promising new class of analgesic agents that treat pain and appear to produce less adverse effects than currently-used opioids.

**Keywords:** Adenylyl cyclase, pain, analgesia, AC1, tolerance

## 51 Introduction

52  
53 Adenylyl cyclases (ACs) are the enzymes responsible for catalyzing the conversion of  
54 adenosine triphosphate (ATP) into cyclic adenosine monophosphate (cAMP).<sup>1,2</sup> ACs  
55 integrate signaling from a large range of proteins and ions, including G protein-coupled  
56 receptors (GPCRs), protein kinases, and calcium, to name a few. There are ten different  
57 isoforms of ACs, nine of them are present in the cellular membrane and one is soluble.  
58 Each AC isoform has a specific expression pattern, which is related to a specific set of  
59 physiological functions.<sup>1</sup> AC isoforms also display a unique set of regulatory properties  
60 that result in differences in how the isoforms are modulated by different types of G  
61 proteins, protein kinases, and ions.<sup>1,2</sup>

62 AC1 is part of the group of ACs that are activated by calcium through calmodulin.<sup>3</sup>  
63 Additional regulatory properties of AC1 include inhibition by  $G\alpha_{i/o}$  and  $G\beta\gamma$  subunits of G  
64 proteins and activation by  $G\alpha_s$  and the small molecule forskolin.<sup>1,4</sup> AC1 has also been  
65 shown to undergo  $G\alpha_{i/o}$ -coupled receptor-mediated superactivation.<sup>4-6</sup> The expression  
66 pattern of AC1 is consistent with the physiological functions that have been associated  
67 with this AC isoform. AC1 transcripts are found in the dorsal root ganglion (DRG), spinal  
68 cord, and anterior cingulate cortex (ACC), and a role for this cyclase in pain and  
69 nociception has been suggested.<sup>7-9</sup> In fact, AC1 knockout (KO) mice display a reduction in  
70 typical behaviors that are induced by inflammatory and neuropathic pain, compared to  
71 wild-type mice.<sup>8,10,11</sup> These studies encouraged the pursuit and discovery of novel  
72 compounds that can selectively inhibit AC1 activity as potential novel pain-relieving  
73 therapeutics.<sup>4,12,13</sup>

74 AC1 transcripts are also found in the hippocampus, a brain region linked to learning and  
75 memory.<sup>14</sup> Notably, AC8, another calcium/calmodulin-activated isoform, is also highly  
76 expressed in the hippocampus.<sup>1,15</sup> Previous studies with single and double AC1/AC8 KO  
77 mice have indicated that some functions of AC1 and AC8 related to learning and memory  
78 are redundant.<sup>14</sup> Specifically, AC1/AC8 double KO mice display impaired long-term  
79 memory in contextual learning and passive avoidance assays, whereas individual KO of  
80 each isoform separately results in wild-type-like behaviors.<sup>14</sup> However, each isoform also  
81 appears to have specific functions. While less severe deficits are observed in AC1-KO  
82 mice compared to the AC1/AC8 double KO, the former still displays reduced long-term  
83 potentiation (LTP) in the hippocampus and impairments in certain recognition memory as  
84 well as spatial and avoidance learning tasks.<sup>16,17</sup> Those studies highlight the importance of  
85 selectivity for AC1 inhibition versus AC8 for a novel compound to treat pain, but do not  
86 exclude the possibility of adverse effects that may result from selective AC1 inhibition in  
87 the hippocampus.

88 We have recently reported the discovery of ST034307, a small molecule inhibitor of AC1  
89 that is selective for AC1 inhibition versus all other membranous AC isoforms, including  
90 AC8.<sup>4</sup> Our previous study focused on the characterization of ST034307 at the molecular  
91 level, showing that the compound is a potent, highly selective, and direct AC1 inhibitor.  
92 Moreover, ST034307 was also analgesic in a mouse model of Complete Freund's  
93 Adjuvant (CFA)-induced allodynia.<sup>4</sup> The present study represents a pre-clinical study with  
94 ST034307 to determine the potential of this class of compounds as novel analgesic agents.  
95 We compared the compound with morphine in mouse models of pain-induced and pain-  
96 depressed behaviors and also showed that the compound is restricted to the periphery  
97 following subcutaneous injections. Further, we showed that ST034307 does not induce

98 analgesic tolerance or cross-tolerance with morphine. Finally, we expanded our previous  
99 mechanistic findings by modeling how the interaction of ST034307 with AC1 happens.

## 100 101 102 **Materials and Methods**

### 103 **Experimental design**

104 The main goal of the present study was to determine the potency and efficacy of the AC1  
105 selective inhibitor ST034307 in mouse models of pain and innate behavior. Male mice  
106 were used as research subjects and sample sizes for the different experiments were  
107 determined using power analyses from preliminary experiments following the guidelines  
108 of Palm Beach Atlantic University's Institutional Animal Care and Use Committee  
109 (IACUC) to attempt to minimize the numbers of animals used. Instances where the  
110 number of animals per group vary in an experiment were the result of additional animals  
111 being required for proper blinding when a drug dose had to be added. All animals were  
112 randomized to treatments and experimenters performing behavioral measurements and  
113 injections were blinded to all compound treatments and doses.

### 114 115 **Materials**

116 ST034307 (6-Chloro-2-(trichloromethyl)-4H-1-benzopyran-4-one) was purchased from  
117 Tocris Bioscience and morphine sulphate from Spectrum Laboratory Products. Acetic  
118 acid, lactic acid, Tween 80, and formaldehyde were from Sigma-Aldrich. Dimethyl  
119 sulfoxide (DMSO) and 0.9% sterile saline were from Fisher Scientific. ST034307 and  
120 morphine were prepared in a vehicle consisting of dimethyl sulfoxide (DMSO), Tween 80,  
121 and milli-Q water (1:1:8). Specifically, ST034307 was first dissolved in DMSO and  
122 sonicated in a 50°C water bath for 15 minutes. Next, Tween 80 was added, the solution  
123 was vortexed, and the sonication was repeated. Warm (37°C) milli-Q water was added and  
124 the solution was vortexed immediately before injections. Acetic acid, lactic acid, and  
125 formalin were diluted in 0.9% sterile saline.

### 126 127 **Animals**

128 Male C57BL/6J mice were purchased from Charles Rivers Laboratories. AC1-KO mice  
129 were created as previously described and propagated using homozygous breeding using  
130 the C57BL/6J background.<sup>17</sup> This particular strain is commonly used in studies related to  
131 analgesic agents<sup>18-20</sup> and provides a way of comparing the activity of ST034307 with other  
132 compounds, given that morphine was used as a positive control. Mice were housed in  
133 groups (2-5 per cage) in cages covered with filter tops (micro barrier top from Allentown),  
134 in a temperature-controlled room under a 12-hour light/dark cycle. Animals had *ad libitum*  
135 access to water and food, as well as nesting material made from pulped virgin cotton fiber  
136 (nestlets from Lab Supply) for enrichment. Corn cob bedding (1/4") was used for bedding.  
137 Mice between 2 and 5 months of age were used for experiments and were dosed  
138 subcutaneously with 10 µl/g of ST034307, morphine, or vehicle solutions. After each  
139 experiment, mice were humanely euthanized via cervical dislocation under isoflurane  
140 anesthesia (open drop method).

141

## 142 **Study approval**

143 All experimental procedures involving mice adhered to the National Institutes of Health  
144 Animal Care guidelines and were approved by Palm Beach Atlantic University's IACUC  
145 (West Palm Beach, FL).

146

## 147 **Formalin-induced paw licking**

148 The formalin-induced paw licking assay was conducted similarly to previously  
149 described.<sup>20</sup> Briefly, mice were acclimated to clear testing cylinders for 45 minutes. Next,  
150 mice were injected subcutaneously with compounds or vehicle solutions and returned to  
151 acrylic cylinders for 15 minutes. Mice were then injected into their right hind paw with 25  
152  $\mu$ l of 5% formalin using a 25  $\mu$ l Hamilton syringe and a 30-gauge needle. Mice were  
153 immediately returned to the testing cylinders, and paw licking time was recorded in 5-  
154 minute intervals for 40 minutes. The experiment was divided into two different phases.  
155 The first represents the time spent licking between 0 and 10 minutes, the second represents  
156 the time spent licking between 16 and 40 minutes.

157

## 158 **Acid-induced writhing**

159 For the acid-induced writhing assay, mice were acclimated to clear testing cylinders for 45  
160 minutes. Next, mice were injected subcutaneously with compounds or vehicle solutions  
161 and returned to acrylic cylinders for 15 minutes. Mice were then injected intraperitoneally  
162 with 0.75% acetic acid (10  $\mu$ l/g), returned to the testing cylinders, and the number of  
163 abdominal constrictions (stretching movements of the body as a whole, including the hind  
164 paws) was counted in 5-minute intervals for 30 minutes as previously described.<sup>21</sup> For the  
165 tolerance assay, mice were injected subcutaneously with either 100 mg/kg morphine or 30  
166 mg/kg ST034307 (solubility issues prevented the use of higher doses) once a day for four  
167 or eight days. At day four or day eight, acid-induced writhing assays were performed.

168

## 169 **Nesting**

170 The mouse nesting assay was adapted from methods previously described.<sup>22</sup> Mice were  
171 single housed and acclimated to their new home cage for three days. During the following  
172 three days, mice underwent one nesting session (as described below) per day to acclimate  
173 them to handling, the experimental procedure, and the testing room. The last acclimation  
174 session included a subcutaneous injection (for compound-inhibited nesting) or a  
175 subcutaneous injection and an intraperitoneal injection (for acid-depressed nesting) with  
176 0.9% saline. On the day after the third acclimation session, mice were injected  
177 subcutaneously with compounds or vehicle and returned to their respective home cages for  
178 10 minutes. Mice were transferred to a transfer cage (< 1 minute) and nestlets were placed in  
179 each of the 6 different zones of the home cage as previously described.<sup>22</sup> Mice were either  
180 returned to their home cages (compound-inhibited nesting) or injected intraperitoneally  
181 (10  $\mu$ l/g) with 1% lactic acid (acid-depressed nesting) and returned to their home cages for  
182 nesting periods. Nesting was scored as the number of zones cleared over time.

183

## 184 **Pharmacokinetic studies**

185 The disposition of ST034307 was studied in male C57BL/6J mice following a single  
186 subcutaneous injection (10 mg/kg). Mice were humanely euthanized via decapitation  
187 under isoflurane anesthesia (open drop method). Subsequently, brain and blood samples  
188 were collected in triplicate at 5-, 25-, 45-, 60-, 120- and 240-minutes post-injection. Blood  
189 was centrifuged, plasma collected and stored at -80°C. The analyses of the samples were  
190 conducted in the Drug Metabolism and Pharmacokinetics Core at Scripps Research. Brain  
191 samples were homogenized with water to form a slurry. ST0304307 was extracted from  
192 plasma and brain slurry on solid-supported liquid-liquid extraction cartridges  
193 (HyperSep™, SLE, 1g/6ml, Thermo Scientific) and the resultant extract was assayed for  
194 ST034307 by tandem mass spectroscopy coupled to HPLC (SCIEX 6500). A plot of  
195 plasma ST0304307 concentration versus time was constructed and analyzed for non-  
196 compartmental pharmacokinetic parameters - half-life, volume of distribution and  
197 clearance (Phoenix, Pharsight, Certara Inc.).

198

## 199 **Molecular Docking**

### 200 Construction of the AC1 model

201 The AC1 model was constructed through ab-initio and threading methods on I-Tasser  
202 server, considering as input the sequences Phe291-Pro478 and Leu859-1058, registered  
203 under the UniProtKB ID Q08828.<sup>23,24</sup> The globular domain regions were identified using  
204 both Pfam and UniProtKB feature viewer, being selected for further refining.<sup>25</sup> Local  
205 sequence alignments with NCBI's BLAST+ were made between the Q08828 and those  
206 from Protein Data Bank (PDB) deposited structures to find experimentally solved  
207 structures with magnesium ions, ATP, and Gα<sub>s</sub> on their respective sites.<sup>26,27</sup> Thus, using  
208 molecular superpositions on VMD 1.9.3, the cofactors and ligands were extracted from the  
209 structure registered as 1CJK on PDB, while Gα<sub>s</sub> was extracted from the structure  
210 registered as 6R3Q, and positioned into the AC1 model.<sup>28</sup> MODELLER 9.25-1 was then  
211 used to run 100 cycles of structural optimizations with molecular dynamics, simulated  
212 annealing, and conjugated gradient.<sup>29</sup> The generated structures were ranked by DOPE-  
213 Score and the best model was selected. To verify the structural quality of the best AC1  
214 model built, the structure was submitted to the SAVES server, where two programs were  
215 selected, PROCHECK (Figs. S1, S2, and S3) and VERIFY 3D (Fig. S4), and to the Swiss-  
216 PROT server, using QMEANDisCo algorithm (Fig. S5).<sup>30-32</sup>

### 217 Preparation of the ST034307 structure

218 ST034307 was constructed and optimized with the HF/6-31G(d) level of theory using the  
219 SPARTAN'16 program (Wavefunction, Inc.).

### 220 Docking using GOLD 2020.3.0 (Genetic Optimization for Ligand Docking)

221 The molecular docking simulation using the GOLD program was carried out using  
222 automatic genetic algorithm parameters settings for the population size, selection-  
223 pressure, number of islands, number of operations, niche size, and operator weights  
224 (migration, mutation, and crossover).<sup>33</sup> The search space was a 40 Å radius sphere from  
225 the 66.215, 105.567, and 81.040 (x, y, and z axes, respectively) coordinates. The scoring  
226 function used was ChemPLP, which is the default function for the GOLD program. Thus,

227 the pose with the most positive score (the best interaction) was extracted for further  
228 analysis.

### 229 Docking using AutoDock Vina 1.1.2

230 The PDBQT-formatted files for the AC1 model and ST034307 structure were generated  
231 using AutoDock Tools (ADT) scripts.<sup>34</sup> Using the AutoDock Vina program, the grid size  
232 was set to 65.172 Å × 77.050 Å × 73.559 Å for x, y, and z axes, respectively, and the grid  
233 center was chosen using 66.215 (x), 105.567 (y), and 81.040 (z) as coordinates. Each  
234 docking run used an exhaustiveness setting of 16 and an energy range of 3 kcal/mol.  
235 Consequently, the pose with the lowest energy was extracted for interaction analysis.

### 237 **Data and statistical analyses**

238 All statistical analyses were carried out using GraphPad Prism 9 software (GraphPad  
239 Software Inc.). Data normalization and nonlinear regressions were carried out similarly to  
240 previously described.<sup>19</sup> For normalizations (representing a rescaling of the Y axis for  
241 enhanced clarity), the maximal possible effect was set as 100% (zero for formalin-induced  
242 paw licking and acid-induced writhing, and five for acid-depressed nesting) and the  
243 response to vehicle's average as 0%. For compound-inhibited nesting, the response from  
244 vehicle's average was defined as 100% and zero to 0%. Normalized data was fitted to  
245 three-parameter nonlinear regressions with the top constrained to 100% and the bottom to  
246 0% (except for the cases where ST034307 did not reach a full response, where no top  
247 constrain was set). All statistical analyses were performed using raw experimental data  
248 (without normalization). T tests with Welch's correction were used for comparisons  
249 between genotypes, one-way ANOVAs for comparisons within groups, and two-way  
250 ANOVAs for time-course evaluations. All ANOVAs where F achieved a statistical level  
251 of significance ( $p < 0.05$ ) were followed by Dunnett's corrections.

## 254 **Results**

### 256 **ST034307 relieves inflammatory pain, but not acute nociception in mice**

257 We have previously shown that intrathecal administration of ST034307 relieves CFA-  
258 mediated allodynia in mice.<sup>4</sup> Here, we used intraplantar formalin injections to the mice's  
259 right hind paws and compared the potency of ST034307 with that of morphine (both  
260 administered subcutaneously) for diminishing acute nociception and relieving  
261 inflammatory pain. The time spent tending to (licking) the injected paw was recorded  
262 (Figs. 1a and 1b). As indicated by previous studies using AC1-KO mice,<sup>11</sup> only morphine  
263 caused a significant reduction in acute nociception, with an ED<sub>50</sub> value equal to 5.87  
264 mg/kg [95% CI 0.44 to 8.96] (Fig. 1c - sum of measurements recorded between 0 and 10  
265 minutes). No significant effect was observed with ST034307. In contrast, both compounds  
266 significantly reduced formalin-induced paw licking in the inflammatory pain phase of the  
267 model compared to vehicle and had ED<sub>50</sub> values equal to 6.88 mg/kg [95% CI 0.85 to  
268 14.05] and 1.67 mg/kg [95% CI 0.35 to 2.43] for ST034307 and morphine, respectively  
269 (Fig. 1d – sum of measurements recorded between 16 and 40 minutes).

270 Consistent with the results from wild-type mice, AC1-KO mice did not present a reduction  
271 of licking during the acute nociception phase of the experiment compared to wild-type  
272 mice ( $p = 0.2089$  in unpaired t test – Fig. 1e). In addition, while morphine relieved acute  
273 nociception in AC1-KO mice ( $p < 0.0001$  in one-way ANOVA), no effects were observed

274 with ST034307 (Fig. 1e). In contrast, AC1-KO mice displayed a significant reduction of  
275 licking in the inflammatory phase of the model, compared to wild-type mice ( $p < 0.001$  in  
276 unpaired t test – Fig. 1f). That reduction was similar to the effect 30 mg/kg ST034307 had  
277 in wild-type mice (Fig. 1f). No effects were observed from a dose of 30 mg/kg ST034307  
278 in AC1-KO mice. Morphine (10 mg/kg) had a small effect in the inflammatory phase, but  
279 it was not significantly different from vehicle ( $p = 0.087$  in one-way ANOVA – Fig. 1e).

### 280 **ST034307 relieves visceral pain and does not induce analgesic tolerance in mice**

281 Visceral pain was induced by an intraperitoneal injection of 0.75% acetic acid. The  
282 number of abdominal stretches (writhing) the mice performed over a period of 30 minutes  
283 was recorded (Figs. 2a and 2b). Both ST034307 and morphine significantly reduced acid-  
284 induced writhing in this model with ED<sub>50</sub> values equal to 0.92 mg/kg [95% CI 0.15 to  
285 4.41] and 0.89 mg/kg [95% CI 0.40 to 1.52], respectively (Fig. 2c). However, ST034307  
286 did not reach full efficacy at doses up to 30 mg/kg. Similarly, AC1-KO mice also only  
287 showed a partial reduction of acid-induced writhing in this model, compared to wild-type  
288 mice ( $p < 0.001$  in unpaired t test, Fig. 2d). This response was not enhanced by 10 mg/kg  
289 ST034307, but 3 mg/kg morphine caused a significant reduction of acid-induced writhing  
290 in AC1-KO mice ( $p < 0.01$  in one-way ANOVA – Fig. 2d).

292 Mice treated chronically with morphine display analgesic tolerance. Tolerance is  
293 expressed through the gradual loss in efficacy of a compound's dose over time.<sup>35</sup> After  
294 four days of daily subcutaneous injections with 100 mg/kg morphine, the efficacy of a 3  
295 mg/kg dose of morphine decreased by nearly half (Fig. 2e). At day eight, morphine's  
296 efficacy was nearly 20% of its initial response (Fig. 2e). In contrast, daily subcutaneous  
297 injections with 30 mg/kg ST034307 (highest dose we were able to inject chronically due  
298 to solubility) caused no decrease in the analgesic efficacy of a 10 mg/kg ST034307 dose at  
299 day four or day eight (Fig. 2e). Notably, no cross-tolerance was developed between the  
300 two compounds (Fig. 2f). Mice treated daily with 100 mg/kg morphine were still fully  
301 responsive to 10 mg/kg ST034307 at days four and eight; and mice treated daily with 30  
302 mg/kg ST034307 were also fully responsive to 3 mg/kg morphine at days four and eight  
303 (Fig. 2f).

### 304 **ST034307 promotes analgesia in the absence of disruptions in the mouse nesting 305 model**

306 Nesting is an innate mouse behavior that can be disrupted by a number of different  
307 stimuli.<sup>22</sup> Drugs, stress, and pain can all impede normal nesting behavior, making the  
308 model appropriate for detecting possible adverse reactions.<sup>36</sup> In the experiment, nesting  
309 material (nestlets) was placed in six different zones of a mouse's cage. As the mouse  
310 makes its nest, it gathers all nestlets in a single zone.<sup>22</sup> We measured the numbers of zones  
311 cleared over time. ST034307 did not disrupt nesting behaviors at doses up to 30 mg/kg  
312 compared to vehicle (Fig. 3a). Morphine, on the other hand, caused a robust reduction of  
313 nesting behavior at 3 mg/kg (Fig. 3b – two-way ANOVA,  $p < 0.001$  and  $p < 0.01$  at 30  
314 and 60 minutes, respectively). Morphine's disruption of nesting behavior at the last time-  
315 point of the experiment resulted in an ED<sub>50</sub> equal to 3.04 mg/kg [95% CI 1.16 to 11.32]  
316 (Fig. 3c).

318 As pain can also disrupt nesting behavior, we next tested whether ST034307 could recover  
319 nesting in mice that were treated with 1% lactic acid intraperitoneally. Lactic acid  
320 treatment caused a profound reduction in nesting behavior (Figs. 3d and 3e). Mice that

321 were treated with 3, 10, or 30 mg/kg ST034307 displayed a significant increase in nesting  
322 behavior compared to vehicle-treated animals (Fig. 3d). For morphine, 0.3 and 1 mg/kg  
323 caused a significant recovery of nesting behavior during the assay, with no significant  
324 effects from 0.1 or 3 mg/kg (Fig. 3e). ST034307's recovery of nesting behavior at the last  
325 time-point of the experiment resulted in an ED<sub>50</sub> equal to 1.45 mg/kg [95% CI 0.22 to  
326 4.93] (Fig. 3f). As the 3 mg/kg dose of morphine depressed mouse nesting, an ED<sub>50</sub> value  
327 was not calculated for the compound (Fig. 3e). The ED<sub>50</sub> value and partial response of  
328 ST034307 in this experiment are consistent with what was observed in the acid-induced  
329 writhing assay (Fig. 2c).

### 331 **ST034307 is restricted to the periphery**

332 Given the positive results from the nesting experiments, we decided to determine the  
333 concentrations of ST034307 in plasma and brain of mice at different timepoints  
334 following a subcutaneous injection with a dose of 10 mg/kg (Fig. 4). A plasma  
335 concentration of 0.44 ( $\pm$  0.08)  $\mu$ M was observed immediately following the injection at 5  
336 minutes. A sharp peak was present 60 minutes after the injection at 1.82 ( $\pm$  0.39)  $\mu$ M and  
337 after 90 minutes, the plasma concentration dropped back to levels similar to the levels  
338 before the peak (0.33  $\mu$ M  $\pm$  0.09). The half-life of ST034307 was determined to be  
339 approximately 161 ( $\pm$  88) minutes and the compound was rapidly cleared (CL/F) from the  
340 body at a rate of 305.04 ( $\pm$  22.63) ml/min. ST034307 may be highly tissue bound as its  
341 volume of distribution (V/F) of 1619 ( $\pm$  790) ml is much greater than the total body water  
342 volume (14.5 ml) of a 24 g (average weight) mouse.<sup>37</sup> This type of distribution may also  
343 indicate extensive red blood cell uptake. To our surprise, none of the timepoints measured  
344 resulted in detectable levels of ST034307 in the brains of those mice. These data indicate  
345 that the analgesic properties of ST034307 observed are due to its actions in the periphery.

### 346 **ST034307 interacts with the interface of C1a and C2a domains of AC1**

347 In order to determine the binding interaction of ST034307 with AC1, we constructed a  
348 molecular model of AC1. The results of PROCHECK's Ramachandran regions (Fig. S1),  
349 main-chain (Fig. S2), and side-chain parameters (Fig. S3), as well as VERIFY 3D (Fig.  
350 S4), and QMEANDisCo (Fig. S5) analyses indicated that the AC1 model was structurally  
351 valid to further computational studies. Thus, to predict the binding mode of ST034307 to  
352 AC1, we carried out molecular docking simulations using two programs, GOLD 2020.3.0  
353 and Autodock Vina 1.1.2.<sup>33,34</sup> Although these programs present differences concerning  
354 their search algorithm and scoring function, the best-predicted poses resulting from the  
355 different programs showed similar binding modes (RMSD = 2.35Å) into the AC1 model  
356 (Fig. 5a). The binding site was located into a cavity adjacent to the ATP binding pocket  
357 and between domains C1a and C2a, at the catalytic site interface. The best predicted pose  
358 for ST034307 presents a chemPLP score of 49.36 a.u, using the GOLD software, showing  
359 a hydrogen bond with the amine group from the side chain of Lys920 (C2a), and steric  
360 interactions with Phe306, Leu350, Cys353, Tyr355, Asp417, Val418, Trp419, Val423,  
361 Asn427, and Glu430 from C1a and with Lys920 and Ile922 from C2a (Figs. 5b and S6a).  
362 Using Autodock Vina, the best-predicted pose for ST034307 presents an interaction  
363 energy value of -6.9 kcal/mol, showing only steric interactions with Phe306, Leu350,  
364 Cys353, Tyr355, Asp417, Val418, Trp419, Ser420, Val423, Thr224, and Asn427 from  
365 C1a and with Lys920 and Ile922 from C2a (Figs. 5c and S6b).



367

## 368 Discussion and Conclusions

369 Previous studies using AC1-KO mice have indicated that inhibition of AC1 could be a  
370 new strategy to treat pain and opioid dependence.<sup>8,10,11,38,39</sup> Inspired by those studies, we  
371 discovered and characterized ST034307.<sup>4</sup> The compound displayed remarkable selectivity  
372 for inhibition of AC1 vs. all other membrane-bound AC isoforms. And while our previous  
373 manuscript focused on the molecular characterization of ST034307, we also showed that  
374 the compound relieves pain in a mouse model of CFA-induced allodynia.<sup>4</sup> Here, those  
375 findings were expanded in multiple different ways.

376 First, we focused on the activity of the compound in two different models of pain-induced  
377 behaviors. In the first, intraplantar injections with formalin to the hind paws of the mice  
378 induce a paw licking behavior that is reflective of pain.<sup>40</sup> The experiment is divided into  
379 two distinct phases. The first phase, which includes the first 10 minutes, represents  
380 chemical nociception due to the action of formalin on primary afferent nerve fibers.<sup>41</sup>  
381 ST034307 had no effects on that phase of the experiment (Fig. 1c). This is consistent with  
382 our results with AC1-KO mice (Fig. 1e) and with a previous study that showed that AC1-  
383 KO mice do not have increased thresholds to thermal, mechanical, or chemical acute  
384 nociception compared to wild-type mice.<sup>11</sup> Morphine, in contrast, reduced chemical  
385 nociception in both wild-type and AC1-KO mice. The formalin-induced paw licking  
386 behavior between minutes 16 and 40 is believed to be caused by the development of an  
387 inflammatory reaction that induces nerve sensitization.<sup>36,40,42</sup> As expected, ST034307  
388 caused a reduction in licking behavior during that phase. A reduction of formalin-induced  
389 paw licking during that phase was also observed in AC1-KO mice compared to wild-type  
390 animals. These data are consistent with previous work showing that AC1-KO mice have  
391 an increased threshold to inflammatory pain and indicate a possible use of selective AC1  
392 inhibitors to treat this type of pain.<sup>11</sup>

393 Next, we showed that ST034307 decreases the number of abdominal constrictions  
394 (writhing) in mice injected intraperitoneally with acetic acid. Intraperitoneal injections  
395 with irritant agents cause peritovisceral pain and previous studies suggest that all  
396 analgesics can reduce abdominal cramps in this model.<sup>36,43</sup> In contrast to morphine,  
397 ST034307 did not result in the maximal possible effect in this experiment, an outcome that  
398 was mimicked by AC1-KO mice. This partial response allowed us to further confirm that  
399 the effect of ST034307 in this model was through AC1 inhibition, as morphine, but not  
400 ST034307, further reduced the number of acid-induced abdominal constrictions in AC1-  
401 KO mice (Fig. 2d).

402 The use of analgesic agents often requires chronic dosing, which may last days, months, or  
403 even years depending on the patient's pain condition. Unfortunately, chronic analgesic  
404 dosing may lead to analgesic tolerance.<sup>44</sup> Opioid tolerance is well documented in humans  
405 and rodents, and results in a loss of analgesic efficacy over time.<sup>19,35,44</sup> At the molecular  
406 level, it has been proposed that opioid tolerance is caused by agonist-induced recruitment  
407 of  $\beta$ arrestins to the mu opioid receptor (MOR).  $\beta$ arrestins induce receptor internalization  
408 (removal from the membrane) and, therefore, reduce the pool of available receptors for  
409 opioid action.<sup>35</sup> As ST034307 acts as an inhibitor of AC1, the mechanisms commonly  
410 linked to tolerance (receptor downregulation) should not be present. Consistently, we did  
411 not observe any tolerance to a high daily dose of ST034307 for up to eight days in the

412 mouse acid-induced writhing assay. This is in contrast to morphine, which displayed a  
413 marked reduction of analgesic efficacy, consistent with analgesic tolerance. As the two  
414 compounds act through different mechanisms (though the MOR inhibits AC1),<sup>4</sup> there was  
415 no observable development of cross-tolerance.

416 Paw licking and abdominal constrictions are examples of pain-stimulated behaviors.  
417 While useful in pain studies, a reduction of these behaviors may not necessarily indicate  
418 pain relief. Compounds that induce paralysis, sedation, or stimulate a competing behavior,  
419 for instance, can still cause a marked reduction of behavior in those experiments, but are  
420 not necessarily relieving pain.<sup>22,36</sup> Therefore, we have employed the pain-depressed  
421 behavior of nesting as another method to determine the analgesic efficacy of ST034307.  
422 Different types of stimuli (such as pain, stress, and sedation) can cause disruptions of  
423 mouse innate behaviors. Therefore, in order for a compound to display pain relief in this  
424 model, it may not present disruptive properties, as if it does, nesting behavior will be  
425 further reduced (see the 3 mg/kg dose of morphine in Figs. 3c and 3e).<sup>22</sup> ST034307 did not  
426 disrupt nesting behavior at doses up to 30 mg/kg, indicating good tolerability in this  
427 model. Furthermore, all doses that were effective at relieving pain in the previous models,  
428 also significantly recovered nesting behavior that was reduced by an intraperitoneal  
429 injection of lactic acid (Fig. 3d). According to Negus (2019), the combination of the  
430 results from our nesting experiments and our pain-stimulated behavior experiments makes  
431 ST034307 (and possibly other AC1-selective inhibitors) a “high-priority” analgesic  
432 compound for “further testing”.<sup>36</sup>

433 While the nesting experiments provide a measure of safety, studies describing the full  
434 spectrum of possible adverse reactions that result from AC1 inhibition are still needed  
435 (and are underway). The high expression levels of AC1 in the hippocampus suggests that  
436 the initial focus of these studies should be on learning and memory. ST034307 is selective  
437 for AC1 vs. AC8. Nevertheless, AC1-KO mice still display impaired performance in  
438 certain learning and memory tasks.<sup>4,16,17</sup> The use of a pharmacological agent will allow us  
439 to determine if those effects are a result of developmental issues (as AC1 expression is  
440 important for synaptic plasticity and development)<sup>45,46</sup> or if there is an acute dose-  
441 dependent effect. If ST034307 is to be used for those experiments, intrathecal or  
442 intracerebroventricular injections will be required to ensure that the compound reaches the  
443 brain. The development of chronic adverse effects, other than analgesic tolerance, should  
444 also be investigated. It is not expected that AC1 inhibitors will be rewarding, but the  
445 current state of the opioid crisis indicates that this should be tested experimentally, and the  
446 effects of AC1 inhibitors on the release of dopamine in the nucleus accumbens should also  
447 be assessed.

448 It is noteworthy that the current experiments were performed with subcutaneous  
449 injections, instead of the intrathecal injections from Brust et al., 2017.<sup>4</sup> This allowed us to  
450 determine the disposition of the compound in plasma and brain. The plasma concentration  
451 of 10 mg/kg ST034307 peaked at 60 minutes after injection. Notably, we were unable to  
452 detect ST034307 in the brain. Nevertheless, the disposition of this compound in plasma  
453 indicates a wide distribution in the body and rapid clearance resulting in relatively low  
454 concentrations compared to the administered dose. These concentrations persist for at least  
455 four hours to account for the effects that are seen in these experiments. These data suggest  
456 that the effects observed in the present studies are due to the actions of the compound in  
457 the periphery. It has recently been reported that the analgesic effects related to a reduction  
458 of AC1 activity is associated with the expression of the enzyme in the DRG and spinal

459 cord.<sup>9</sup> As the DRG is located in the periphery, it is likely that this is the site responsible  
460 for the analgesic properties of ST034307. The fact that ST034307 is not reaching the brain  
461 also precludes the compound's activity in the hippocampus and makes it unlikely that this  
462 particular compound, when administered subcutaneously, would cause adverse effects  
463 related to learning and memory.

464 In the last set of data presented in the manuscript, the interaction between ST034307 and  
465 AC1 was mapped using molecular docking. Those results, achieved using of two different  
466 programs, suggest that ST034307 interacts at a site located between the ATP and forskolin  
467 binding sites. This binding site is located at the interface of the C1a and C2a domains and  
468 is indicative of a non-competitive or uncompetitive mechanism. The action of ST034307  
469 is proposed to cause a disruption of the structure of AC1's catalytic domain and,  
470 consequently, enzymatic inhibition. As our modeling showed that ST034307 does not bind  
471 to the ATP binding site, it is consistent with our previous findings that indicate that the  
472 compound is not a P-site inhibitor.<sup>1,4</sup>

473 As encouraging as the data presented in the manuscript appears, other compounds that  
474 looked promising in pre-clinical models of pain have failed to translate to clinic.<sup>36</sup> While  
475 the nesting experiments account for some adverse effects and competing behaviors that  
476 may generate false positives, additional studies on ST034307 and the class of AC1  
477 inhibitors are still needed. Particular attention should be devoted to possible impairments  
478 on learning and memory as well as other models of pain that reflect pain states that are  
479 different from the ones already examined. Experiments with AC1 inhibitors that can reach  
480 the brain are also desired. Nevertheless, the present work clearly demonstrates a  
481 correlation between selective inhibition of AC1 and behaviors that are consistent with  
482 analgesia in mice. More work is still needed to establish this class of compounds as novel  
483 pain therapeutics; however, the present study represents an important step that may signal  
484 that selective AC1 inhibitors should be prioritized for further testing and advancement for  
485 the treatment of pain.

## 486 487 488 **Supplementary Materials**

489 Fig. S1. Ramachandran plot statistics analysis of the adenylyl cyclase 1 model.

490 Fig. S2. Main-chain stereochemical parameters statistical analysis of the adenylyl cyclase  
491 1 model.

492 Fig. S3. Side-chain stereochemical parameters statistical analysis of the adenylyl cyclase 1  
493 model.

494 Fig. S4. Three-dimensional profile analysis of the adenylyl cyclase 1 model.

495 Fig. S5. QMEANDisCo analysis of the adenylyl cyclase 1 model.

496 Fig. S6. 2D representation of the ST034307 poses.

497  
498  
499 **Data and materials availability:** All data required to evaluate the conclusions in the paper are  
500 present in the manuscript or references. Materials will be made available upon request.

## 501 502 **Acknowledgements**

503 Funding: This work is supported by the American Association of Colleges of Pharmacy's  
504 New Investigator Award (T.F.B.), the Lloyd L. Gregory School of Pharmacy's  
505

IntegraConnect grant (T.F.B and A.N.), and Palm Beach Atlantic University's Quality Initiative grant (T.F.B.), Fundação Carlos Chagas Filho de Amparo à Pesquisa do Estado do Rio de Janeiro (FAPERJ) (N.B.), Conselho Nacional de Desenvolvimento Científico e Tecnológico (CNPq), Fundação de Apoio à Fiocruz (FIOTEC) (N.B.), Coordenação de Aperfeiçoamento de Pessoal de Nível Superior (CAPES) – Finance Code 001 (N.B.), and Programa Nacional de Apoio ao Desenvolvimento da Metrologia, Qualidade e Tecnologia (PRONAMETRO) from Instituto Nacional de Metrologia, Qualidade e Tecnologia (INMETRO) (T.V.A.F.).

**Author Contributions:** Conceptualization: T.F.B. Experimental design: T.F.B., G.G., A.N., L.V.B.H. Performed experiments: T.F.B., G.G., T.P., L.V.B.H., A.S.M., T.V.A.F., V.S.P. Data analyses: T.F.B., L.V.B.H., A.N. Provided needed equipment or materials: N.B., H.W. Writing: T.F.B. wrote the first draft of the manuscript and all authors contributed, reviewed, and edited.

**Competing Financial Interests statement:** The authors have no competing interests.

## References

- 1 Dessauer, C. W. *et al.* International Union of Basic and Clinical Pharmacology. CI. Structures and Small Molecule Modulators of Mammalian Adenylyl Cyclases. *Pharmacol Rev* **69**, 93-139, doi:10.1124/pr.116.013078 (2017).
- 2 Cooper, D. & Crossthwaite, A. Higher-order organization and regulation of adenylyl cyclases. *Trends Pharmacol Sci* **27**, 426-431, doi:10.1016/j.tips.2006.06.002 (2006).
- 3 Masada, N., Schaks, S., Jackson, S. E., Sinz, A. & Cooper, D. M. Distinct mechanisms of calmodulin binding and regulation of adenylyl cyclases 1 and 8. *Biochemistry* **51**, 7917-7929, doi:10.1021/bi300646y (2012).
- 4 Brust, T. F. *et al.* Identification of a selective small-molecule inhibitor of type 1 adenylyl cyclase activity with analgesic properties. *Sci Signal* **10**, doi:10.1126/scisignal.aah5381 (2017).
- 5 Brust, T. F., Conley, J. M. & Watts, V. J. Galphai/o-coupled receptor-mediated sensitization of adenylyl cyclase: 40 years later. *Eur J Pharmacol* **763**, 223-232, doi:10.1016/j.ejphar.2015.05.014 (2015).
- 6 Cumbay, M. & Watts, V. Heterologous sensitization of recombinant adenylate cyclases by activation of D(2) dopamine receptors. *J Pharmacol Exp Ther.* **297**, 297(293) (2001).
- 7 Wei, F. *et al.* Calcium calmodulin-stimulated adenylyl cyclases contribute to activation of extracellular signal-regulated kinase in spinal dorsal horn neurons in adult rats and mice. *J Neurosci* **26**, 851-861, doi:10.1523/JNEUROSCI.3292-05.2006 (2006).
- 8 Xu, H. *et al.* Presynaptic and postsynaptic amplifications of neuropathic pain in the anterior cingulate cortex. *J Neurosci* **28**, 7445-7453, doi:10.1523/JNEUROSCI.1812-08.2008 (2008).
- 9 Johnson, K., Doucette, A., Edwards, A., Watts, V. J. & Klein, A. H. Reduced activity of Adenylyl Cyclase 1 Attenuates Morphine Induced Hyperalgesia and Inflammatory Pain in Mice. *bioRxiv*, 2020.2012.2002.408419, doi:10.1101/2020.12.02.408419 (2020).
- 10 Vadakkan, K. I. *et al.* Genetic reduction of chronic muscle pain in mice lacking calcium/calmodulin-stimulated adenylyl cyclases. *Mol Pain* **2**, 7, doi:10.1186/1744-8069-2-7 (2006).

- 555 11 Wei, F. *et al.* Genetic elimination of behavioral sensitization in mice lacking calmodulin-  
556 stimulated adenylyl cyclases. *Neuron* **36**, 713-726 (2002).
- 557 12 Brand, C. S., Hocker, H. J., Gorfe, A. A., Cavasotto, C. N. & Dessauer, C. W. Isoform  
558 selectivity of adenylyl cyclase inhibitors: characterization of known and novel  
559 compounds. *J Pharmacol Exp Ther* **347**, 265-275, doi:10.1124/jpet.113.208157 (2013).
- 560 13 Kaur, J. *et al.* Optimization of a 1,3,4-oxadiazole series for inhibition of  
561 Ca(2+)/calmodulin-stimulated activity of adenylyl cyclases 1 and 8 for the treatment of  
562 chronic pain. *Eur J Med Chem* **162**, 568-585, doi:10.1016/j.ejmech.2018.11.036 (2018).
- 563 14 Wong, S. T. *et al.* Calcium-stimulated adenylyl cyclase activity is critical for  
564 hippocampus-dependent long-term memory and late phase LTP. *Neuron* **23**, 787-798  
565 (1999).
- 566 15 Wang, H. *et al.* Type 8 adenylyl cyclase is targeted to excitatory synapses and required for  
567 mossy fiber long-term potentiation. *J Neurosci* **23**, 9710-9718 (2003).
- 568 16 Shan, Q., Chan, G. C. & Storm, D. R. Type 1 adenylyl cyclase is essential for maintenance  
569 of remote contextual fear memory. *J Neurosci* **28**, 12864-12867,  
570 doi:10.1523/JNEUROSCI.2413-08.2008 (2008).
- 571 17 Zheng, F. *et al.* Voluntary running depreciates the requirement of Ca<sup>2+</sup>-stimulated cAMP  
572 signaling in synaptic potentiation and memory formation. *Learn Mem* **23**, 442-449,  
573 doi:10.1101/lm.040642.115 (2016).
- 574 18 Brust, T. F. *et al.* Biased agonists of the kappa opioid receptor suppress pain and itch  
575 without causing sedation or dysphoria. *Sci Signal* **9**, ra117, doi:10.1126/scisignal.aai8441  
576 (2016).
- 577 19 Grim, T. W. *et al.* A G protein signaling-biased agonist at the mu-opioid receptor reverses  
578 morphine tolerance while preventing morphine withdrawal. *Neuropsychopharmacology*  
579 **45**, 416-425, doi:10.1038/s41386-019-0491-8 (2020).
- 580 20 Pantouli, F. *et al.* Comparison of morphine, oxycodone and the biased MOR agonist SR-  
581 17018 for tolerance and efficacy in mouse models of pain. *Neuropharmacology* **185**,  
582 108439, doi:10.1016/j.neuropharm.2020.108439 (2021).
- 583 21 Tarselli, M. A. *et al.* Synthesis of conolidine, a potent non-opioid analgesic for tonic and  
584 persistent pain. *Nat Chem* **3**, 449-453, doi:10.1038/nchem.1050 (2011).
- 585 22 Negus, S. S. *et al.* Effects of ketoprofen, morphine, and kappa opioids on pain-related  
586 depression of nesting in mice. *Pain* **156**, 1153-1160,  
587 doi:10.1097/j.pain.000000000000171 (2015).
- 588 23 Yang, J. & Zhang, Y. I-TASSER server: new development for protein structure and  
589 function predictions. *Nucleic Acids Res* **43**, W174-181, doi:10.1093/nar/gkv342 (2015).
- 590 24 UniProt, C. UniProt: the universal protein knowledgebase in 2021. *Nucleic Acids Res* **49**,  
591 D480-D489, doi:10.1093/nar/gkaa1100 (2021).
- 592 25 Mistry, J. *et al.* Pfam: The protein families database in 2021. *Nucleic Acids Res* **49**, D412-  
593 D419, doi:10.1093/nar/gkaa913 (2021).
- 594 26 Altschul, S. F., Gish, W., Miller, W., Myers, E. W. & Lipman, D. J. Basic local alignment  
595 search tool. *J Mol Biol* **215**, 403-410, doi:10.1016/S0022-2836(05)80360-2 (1990).
- 596 27 Berman, H. M. *et al.* The Protein Data Bank. *Acta Crystallogr D Biol Crystallogr* **58**, 899-  
597 907, doi:10.1107/s0907444902003451 (2002).
- 598 28 Humphrey, W., Dalke, A. & Schulten, K. VMD: visual molecular dynamics. *J Mol Graph*  
599 **14**, 33-38, 27-38, doi:10.1016/0263-7855(96)00018-5 (1996).
- 500 29 Sali, A. & Blundell, T. L. Comparative protein modelling by satisfaction of spatial  
501 restraints. *J Mol Biol* **234**, 779-815, doi:10.1006/jmbi.1993.1626 (1993).
- 502 30 Colovos, C. & Yeates, T. O. Verification of protein structures: patterns of nonbonded  
503 atomic interactions. *Protein Sci* **2**, 1511-1519, doi:10.1002/pro.5560020916 (1993).

- 504 31 Studer, G. *et al.* QMEANDisCo-distance constraints applied on model quality estimation.  
505 *Bioinformatics* **36**, 1765-1771, doi:10.1093/bioinformatics/btz828 (2020).
- 506 32 Laskowski, R. A., MacArthur, M. W., Moss, D. S. & Thornton, J. M. PROCHECK: a  
507 program to check the stereochemical quality of protein structures. *Journal of Applied*  
508 *Crystallography* **26**, 283-291, doi:doi:10.1107/S0021889892009944 (1993).
- 509 33 Jones, G., Willett, P., Glen, R. C., Leach, A. R. & Taylor, R. Development and validation  
510 of a genetic algorithm for flexible docking. *J Mol Biol* **267**, 727-748,  
511 doi:10.1006/jmbi.1996.0897 (1997).
- 512 34 Trott, O. & Olson, A. J. AutoDock Vina: improving the speed and accuracy of docking  
513 with a new scoring function, efficient optimization, and multithreading. *J Comput Chem*  
514 **31**, 455-461, doi:10.1002/jcc.21334 (2010).
- 515 35 Raehal, K. M., Schmid, C. L., Groer, C. E. & Bohn, L. M. Functional selectivity at the  
516 mu-opioid receptor: implications for understanding opioid analgesia and tolerance.  
517 *Pharmacol Rev* **63**, 1001-1019, doi:10.1124/pr.111.004598 (2011).
- 518 36 Negus, S. S. Core Outcome Measures in Preclinical Assessment of Candidate Analgesics.  
519 *Pharmacol Rev* **71**, 225-266, doi:10.1124/pr.118.017210 (2019).
- 520 37 Davies, B. & Morris, T. Physiological parameters in laboratory animals and humans.  
521 *Pharm Res* **10**, 1093-1095, doi:10.1023/a:1018943613122 (1993).
- 522 38 Zachariou, V. *et al.* Distinct roles of adenylyl cyclases 1 and 8 in opiate dependence:  
523 behavioral, electrophysiological, and molecular studies. *Biol Psychiatry* **63**, 1013-1021,  
524 doi:10.1016/j.biopsych.2007.11.021 (2008).
- 525 39 Luo, J., Phan, T. X., Yang, Y., Garelick, M. G. & Storm, D. R. Increases in cAMP,  
526 MAPK activity, and CREB phosphorylation during REM sleep: implications for REM  
527 sleep and memory consolidation. *J Neurosci* **33**, 6460-6468,  
528 doi:10.1523/JNEUROSCI.5018-12.2013 (2013).
- 529 40 Tjolsen, A., Berge, O. G., Hunskaar, S., Rosland, J. H. & Hole, K. The formalin test: an  
530 evaluation of the method. *Pain* **51**, 5-17, doi:10.1016/0304-3959(92)90003-T (1992).
- 531 41 McNamara, C. R. *et al.* TRPA1 mediates formalin-induced pain. *Proc Natl Acad Sci U S*  
532 *A* **104**, 13525-13530, doi:10.1073/pnas.0705924104 (2007).
- 533 42 Woolf, C. J. Evidence for a central component of post-injury pain hypersensitivity. *Nature*  
534 **306**, 686-688, doi:10.1038/306686a0 (1983).
- 535 43 Collier, H. O., Dinneen, L. C., Johnson, C. A. & Schneider, C. The abdominal constriction  
536 response and its suppression by analgesic drugs in the mouse. *Br J Pharmacol Chemother*  
537 **32**, 295-310 (1968).
- 538 44 Stein, C. Opioid Receptors. *Annu Rev Med* **67**, 433-451, doi:10.1146/annurev-med-  
539 062613-093100 (2016).
- 540 45 Haupt, C., Langhoff, J. & Huber, A. B. Adenylate Cyclase 1 modulates peripheral nerve  
541 branching patterns. *Mol Cell Neurosci* **45**, 439-448, doi:10.1016/j.mcn.2010.08.003  
542 (2010).
- 543 46 Wang, H., Liu, H., Storm, D. R. & Zhang, Z. W. Adenylate cyclase 1 promotes  
544 strengthening and experience-dependent plasticity of whisker relay synapses in the  
545 thalamus. *J Physiol* **589**, 5649-5662, doi:10.1113/jphysiol.2011.213702 (2011).
- 546 47 Pettersen, E. F. *et al.* UCSF Chimera--a visualization system for exploratory research and  
547 analysis. *J Comput Chem* **25**, 1605-1612, doi:10.1002/jcc.20084 (2004).
- 548  
549  
550  
551  
552  
553

## Figure Legends

**Fig. 1. ST034307 relieves inflammatory pain in mice.** (a) Different doses of ST034307 reduce paw licking behavior caused by an intraplantar injection with 5% formalin. (b) Different doses of morphine reduce paw licking behavior caused by an intraplantar injection with 5% formalin. (c) Dose-response curves of the sum of time spent licking the paw during the first 10 minutes of the graphs in A and B. Vehicle's response was set as 0% and the maximal possible effect (0) to 100%. (d) Dose-response curves of the sum of time spent licking the paw during the period in between minute 16 and minute 40 of the graphs in A and B. Vehicle's response was set as 0% and the maximal possible effect (0) to 100%. (e) Reduction of time spent licking the injected paw in wild-type (WT) and in AC1-KO mice treated with vehicle (V), 30 mg/kg ST034307 (S), or 10 mg/kg morphine (M) during the first 10 minutes of the experiment. (f) Reduction of time spent licking the injected paw in wild-type (WT) and in AC1-KO mice treated with vehicle (V), 30 mg/kg ST034307 (S), or 10 mg/kg morphine (M) during the first 10 minutes of the experiment. For E and F vehicle's response in wild-type mice was set to 0% and zero to 100%. Data in all graphs represent the average  $\pm$  S.E.M., N = 6-8. \*\*\*\* $p < 0.0001$  in one-way ANOVA with Dunnett's test.

**Fig. 2. ST034307 relieves visceral pain in mice.** (a) Different doses of ST034307 reduce the number of abdominal constrictions caused by an intraperitoneal injection with 0.75% acetic acid; N = 8-10. (b) Different doses of morphine reduce the number of abdominal constrictions caused by an intraperitoneal injection with 0.75% acetic acid; N=8-10. (c) Dose-response curves of the total number of abdominal constrictions from the graphs in A and B. Vehicle's response was set as 0% and the maximal possible effect (0) to 100%. (d) Reduction of the total number of abdominal constrictions in wild-type (WT) and in AC1-KO mice treated with vehicle (V), 30 mg/kg ST034307 (S), or 10 mg/kg morphine (M). Vehicle's response in wild-type mice was set as 0% and zero to 100%; N = 5. (e) Mice were injected daily with 30 mg/kg ST034307 or 100 mg/kg morphine and on day four or eight acid-induced writhing assays were performed. Mice that chronically received morphine displayed a decrease in efficacy of 3 mg/kg morphine on days four or eight, compared to a group of mice that received vehicle plus 3 mg/kg morphine on day zero. Mice that chronically received ST034307 did not display any changes in efficacy of 10 mg/kg ST034307; N = 5. (f) Mice were injected daily with 30 mg/kg ST034307 or 100 mg/kg morphine and on day four or eight acid-induced writhing assays were performed. Mice that chronically received morphine did not display any changes in efficacy with 10 mg/kg ST034307. Mice that chronically received ST034307 did not display any changes in efficacy with 3 mg/kg morphine; N = 5. Data in all graphs represent the average  $\pm$  S.E.M. \* $p < 0.05$ , \*\* $p < 0.01$ , \*\*\*  $p < 0.001$  in one-way ANOVA with Dunnett's test.

**Fig. 3. ST034307 rescues acid-depressed mouse nesting behavior.** (a) ST034307 did not reduce mouse nesting behavior at doses up to 30 mg/kg. (b) At a dose of 3 mg/kg, morphine significantly reduced mouse nesting behavior at 30 and 60 minutes after nesting measurements were started. (c) Dose-response curves of the last experimental timepoints the graphs in A and B. Vehicle's response was set as 100% and the maximal possible effect (0) to 0%. (d) and (e) 3 mg/kg, 10 mg/kg, and 30 mg/kg ST034307 and 1 mg/kg morphine significantly rescued mouse

704 nesting behavior that was reduced by an intraperitoneal injection of 1% lactic acid.  
705 (f) Dose-response curves of the last experimental timepoints from the graphs in D  
706 and E. Vehicle's response was set as 0% and the maximal possible effect (5) to  
707 100%. Data in all graphs represent the average  $\pm$  S.E.M., N = 6-8. \* $p$  < 0.05, \*\* $p$  <  
708 0.01, \*\*\* $p$  < 0.001 in two-way ANOVA with Dunnett's test.  
709

710 **Fig. 4. Plasma ST0304307 concentration versus time profile after a single**  
711 **subcutaneous injection in mice.** Mice were injected with a dose of 10 mg/kg.  
712 Data in the graph represent the average  $\pm$  S.E.M., N = 2-3.  
713

714 **Fig. 5. Prediction of the interaction between AC1 and ST034307.** (a) Cartoon  
715 representation of the AC1 model, showing its catalytic domain (C1a, in red, and  
716 C2a, in green) complexed to  $G\alpha_s$  (in blue), ST034307 (in cyan or purple), ATP (in  
717 yellow), and two magnesium ions ( $Mg^{2+}$ , in green). Predicted poses of ST034307,  
718 using Gold (b) and Autodock Vina (c) programs, presenting hydrogen-bond  
719 (interrupted purple line) and steric interactions. The AC1 residue structures are  
720 shown as ball and stick models, the ST034307 inhibitor and ATP as stick models,  
721 and  $Mg^{2+}$  ions as sphere models using UCSF Chimera program.<sup>47</sup> All the structures  
722 are colored by atom: the nitrogen atoms are shown in blue, the oxygen atoms in  
723 red, the chlorine atoms in green, the hydrogen atoms in white, and the carbon chain  
724 in gray, cyan, or purple. Non-polar hydrogens have been omitted for clarity.  
725  
726  
727  
728  
729  
730  
731  
732  
733  
734  
735  
736  
737  
738  
739  
740  
741  
742  
743  
744  
745  
746  
747  
748  
749  
750  
751  
752  
753



754

**Figure 1**

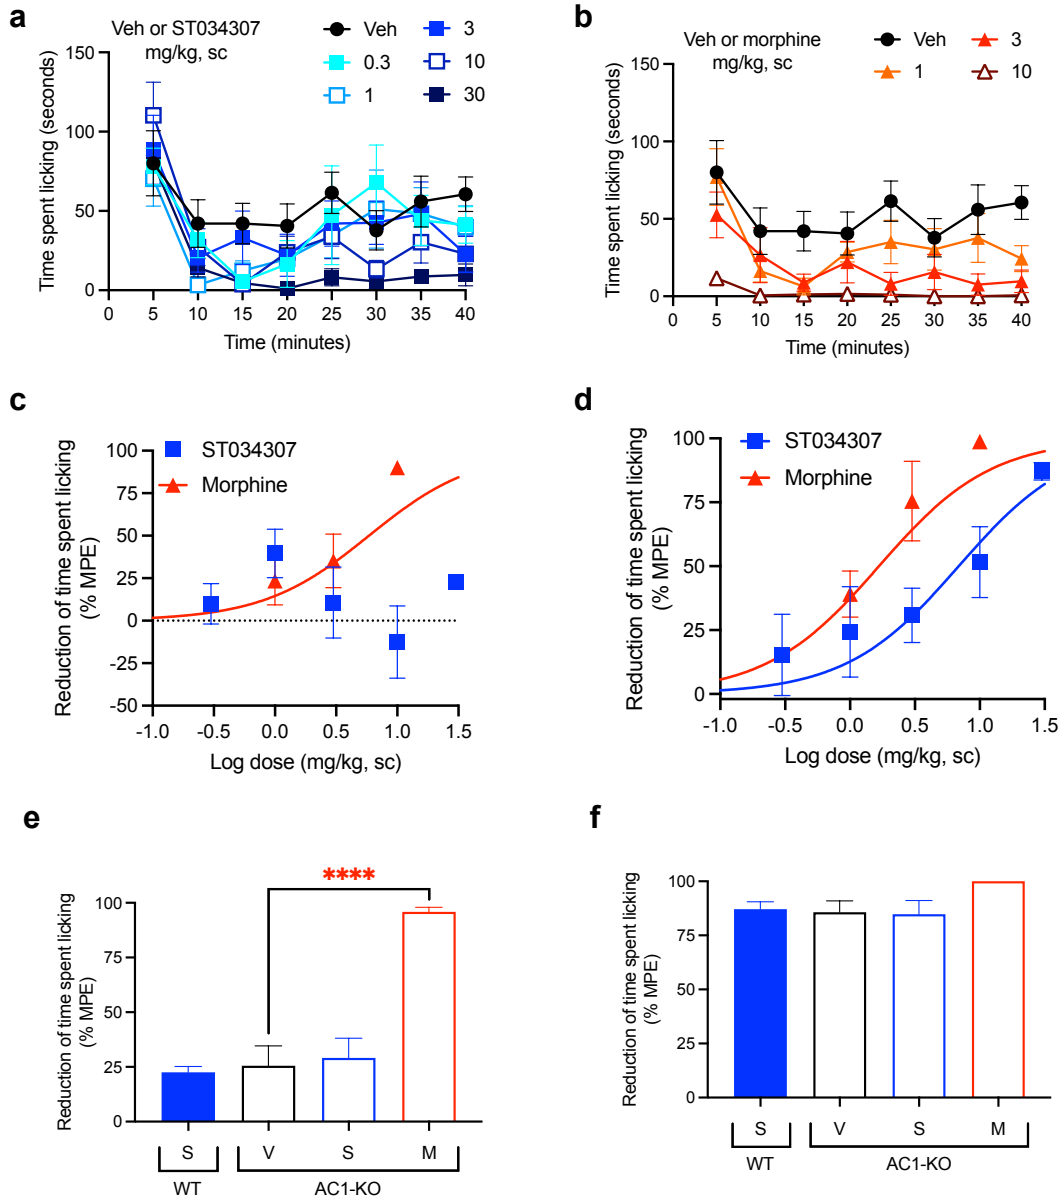

755  
756  
757  
758  
759  
760  
761  
762  
763  
764  
765  
766  
767  
768  
769  
770  
771

772  
773

**Figure 2**

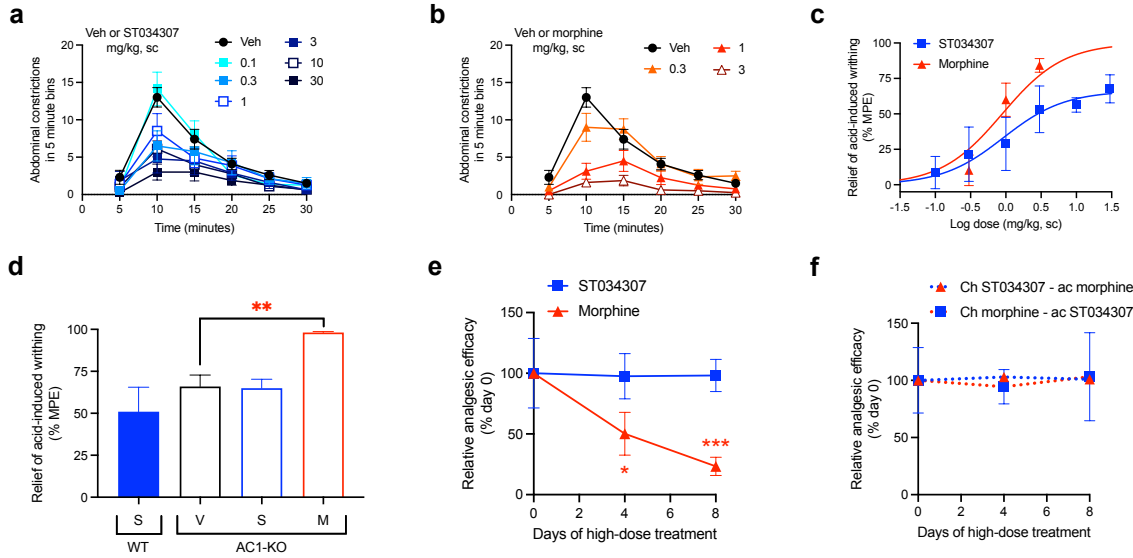

774  
775  
776  
777  
778  
779  
780  
781  
782  
783  
784  
785  
786

**Figure 3**

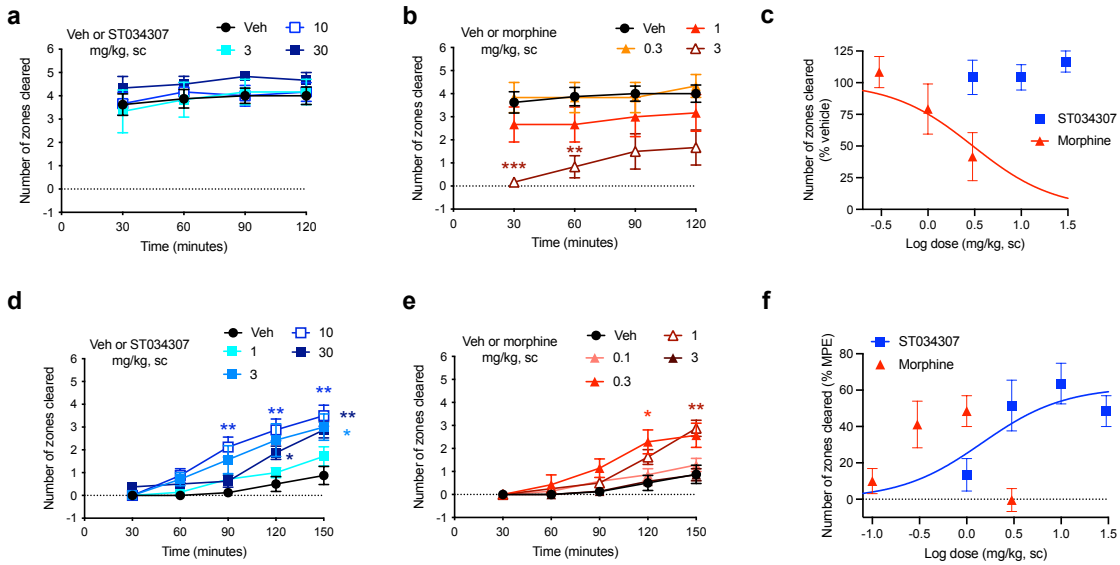

787  
788  
789  
790  
791  
792

793  
794

**Figure 4**

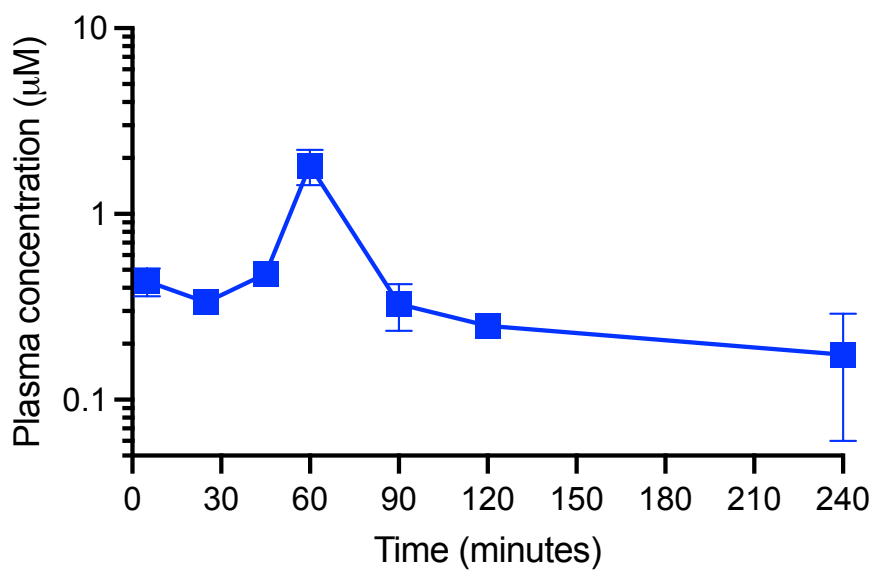

795  
796  
797  
798  
799  
300  
301  
302  
303

**Figure 5**

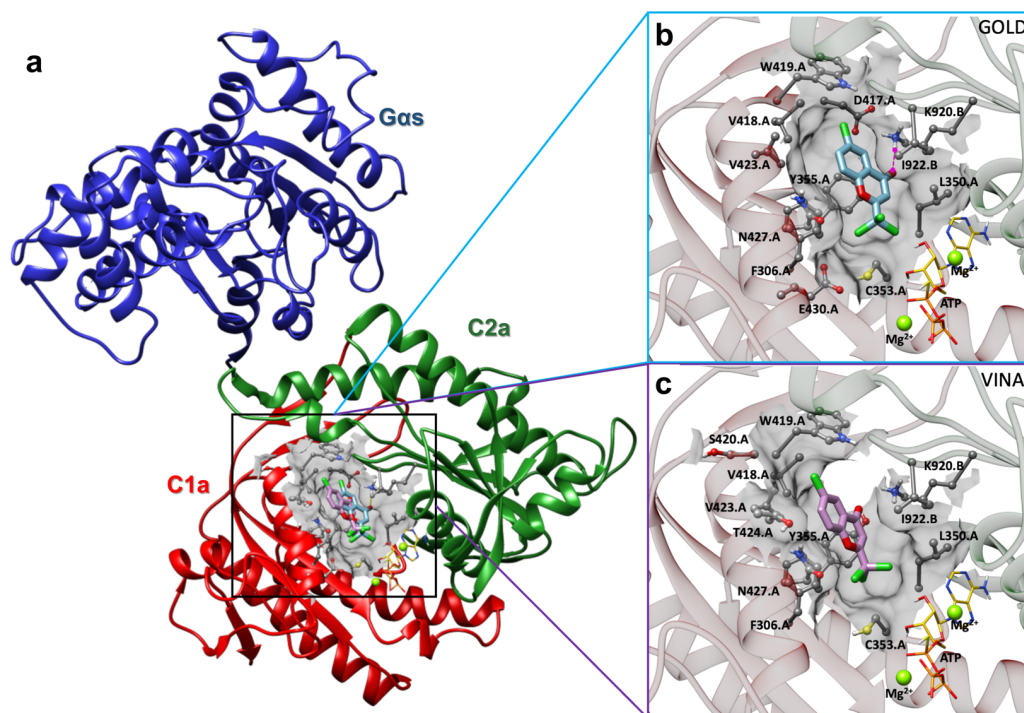

304
